# Supplementary material for: Re-Valuation of the Taxonomic Status of Species within the Inocybe similis Complex
Source: MDPI journal article supplement (doi:10.3390/jof9060679), 2023-06-16
Supplement: s1 [file s1]

Table S1. This is a table with ecological note about *I. similis* and *I. chondrospora*.

| <u>Species</u>                     | Vouchers                              | Habitat/Hosts                                            |                                      |
|------------------------------------|---------------------------------------|----------------------------------------------------------|--------------------------------------|
|                                    |                                       | Specie                                                   | plant family                         |
| <u><i>Inocybe similis</i></u>      | B11-9-18-1                            | Willow tree (Salix sp.)                                  | Salicaceae                           |
| <u><i>Inocybe similis</i></u>      | BR-142866-82 (I. vulpinella Holotype) | Salix spp.                                               | Salicaceae                           |
| <u><i>Inocybe similis</i></u>      | MBN0213_15                            | Picea glauca                                             | Pinaceae                             |
| <u><i>Inocybe similis</i></u>      | MCVE28976                             | Populus tremula and Pinus halepensis                     | Salicaceae and Pinaceae              |
| <u><i>Inocybe similis</i></u>      | MCVE29100                             | Populus tremula and Salix sp.                            | Salicaceae                           |
| <u><i>Inocybe similis</i></u>      | MCVE29287                             | Populus tremula and Pinus halepensis                     | Salicaceae and Pinaceae              |
| <u><i>Inocybe similis</i></u>      | S-F14475 (I. similis Holotype)        | Populus nigra                                            | Salicaceae                           |
| <u><i>Inocybe similis</i></u>      | GB: MW012258                          | Unknown                                                  | unknown                              |
| <u><i>Inocybe similis</i></u>      | GB: OW847005                          | Unknown                                                  | unknown                              |
| <u><i>Inocybe chondrospora</i></u> | 3918                                  | Unknown                                                  |                                      |
| <u><i>Inocybe chondrospora</i></u> | AH34419                               | Salix repens cf.                                         | Salicaceae                           |
| <u><i>Inocybe chondrospora</i></u> | EL000610                              | Unknown                                                  | unknown                              |
| <u><i>Inocybe chondrospora</i></u> | EL18106                               | Unknown                                                  | unknown                              |
| <u><i>Inocybe chondrospora</i></u> | GDOR5393                              | Salix herbacea L.                                        | Salicaceae                           |
| <u><i>Inocybe chondrospora</i></u> | IK-00033                              | Scots pine ( with alder, poplar, and willow in vicinity) | Pinaceae (Betulaceae and Salicaceae) |
| <u><i>Inocybe chondrospora</i></u> | IK-00034                              | Scots pine ( with alder, poplar, and willow in vicinity) | Pinaceae (Betulaceae and Salicaceae) |
| <u><i>Inocybe chondrospora</i></u> | IK-00061                              | Scots pine ( with alder, poplar, and willow in vicinity) | Pinaceae (Betulaceae and Salicaceae) |
| <u><i>Inocybe chondrospora</i></u> | IvulpiSA01                            | Pinus sylvestris, Salix sp.                              | Salicaceae and Pinaceae              |

|                                    |                                      |                                                                                            |                                     |
|------------------------------------|--------------------------------------|--------------------------------------------------------------------------------------------|-------------------------------------|
| <u><i>Inocybe chondrospora</i></u> | IvulpiSA02                           | Salix sp.                                                                                  | Salicaceae                          |
| <u><i>Inocybe chondrospora</i></u> | KR-M-0038284                         | Unknown                                                                                    |                                     |
| <u><i>Inocybe chondrospora</i></u> | L0054131 (I. immigrans Isotype)      | <i>Betula papyrifera</i> ,<br><i>Populus balsamifera</i> ,<br><i>Salix</i> sp.             | Betulaceae and Salicaceae           |
| <u><i>Inocybe chondrospora</i></u> | M-0151621 (I. chondrospora Holotype) | <i>Alnus glutinosa</i> ,<br><i>Salix aurita</i>                                            | Betulaceae and Salicaceae           |
| <u><i>Inocybe chondrospora</i></u> | NI250904 (CUW)                       | Unknown                                                                                    | unknown                             |
| <u><i>Inocybe chondrospora</i></u> | OTU_127                              | <i>Liparis loeselii</i>                                                                    | Orchidaceae                         |
| <u><i>Inocybe chondrospora</i></u> | saf_F1979                            | soil of alpine saffron agroecosystem (probably associated with other species not reported) | unknown                             |
| <u><i>Inocybe chondrospora</i></u> | SMNS-STU-F-0901555 (DB4-5-13-2)      | <i>Salix</i> sp. and <i>Populus tremula</i>                                                | Salicaceae                          |
| <u><i>Inocybe chondrospora</i></u> | SMNS-STU-F-0901556 (DB2-9-12-4)      | <i>Salix repens</i>                                                                        | Salicaceae                          |
| <u><i>Inocybe chondrospora</i></u> | SMNS-STU-F-0901557 (DB26-9-17-7b)    | <i>Populus tremula</i> , <i>Salix</i> sp, <i>Pinus sylvestris</i> , <i>Betula</i> sp.      | Salicaceae, Betulaceae and Pinaceae |
| <u><i>Inocybe chondrospora</i></u> | TAA17205                             | Unknown                                                                                    | unknown                             |
| <u><i>Inocybe chondrospora</i></u> | UDB001758                            | Salix sp.                                                                                  | Salicaceae                          |
| <u><i>Inocybe chondrospora</i></u> | UDB017619                            | <i>Salix repens</i> L.                                                                     | Salicaceae                          |
| <u><i>Inocybe chondrospora</i></u> | UDB024668                            | Unknown                                                                                    | unknown                             |
| <u><i>Inocybe chondrospora</i></u> | UDB039523                            | Unknown                                                                                    | unknown                             |
| <u><i>Inocybe chondrospora</i></u> | UDB0754144                           | Unknown                                                                                    | unknown                             |
